# Supplementary material for: Isolation and Functional Characterization of MsFTa, a FLOWERING LOCUS T Homolog from Alfalfa (Medicago sativa)
Source: PubMed Central journal article supplement (PMC6514984; doi:10.3390/ijms20081968), 2019-04-22
Supplement: ijms-20-01968-s001.pdf [file ijms-20-01968-s001.pdf]

**Table S1.** Homology matrix of some FT-like proteins in rice, soybean, barley, barrel clover, poplar and alfalfa.

| Gene          | AtFT | Nt6G03MtFTc | MtFTb2      | MtFTb1 | MtFTa2 | MtFTa1 | MtFTa |      |      |      |      |      |             |             |      |      |      |      |      |      |      |      |      |      |      |      |      |      |      |      |      |      |      |
|---------------|------|-------------|-------------|--------|--------|--------|-------|------|------|------|------|------|-------------|-------------|------|------|------|------|------|------|------|------|------|------|------|------|------|------|------|------|------|------|------|
| Hv1Hv1g076430 | 1.00 |             |             |        |        |        |       |      |      |      |      |      |             |             |      |      |      |      |      |      |      |      |      |      |      |      |      |      |      |      |      |      |      |
| Hv2Hv1g023180 | 0.59 | 1.00        |             |        |        |        |       |      |      |      |      |      |             |             |      |      |      |      |      |      |      |      |      |      |      |      |      |      |      |      |      |      |      |
| hv2Hr1g084540 | 0.51 | 0.54        | 1.00        |        |        |        |       |      |      |      |      |      |             |             |      |      |      |      |      |      |      |      |      |      |      |      |      |      |      |      |      |      |      |
| Hv3Hr1g027590 | 0.65 | 0.62        | 0.59        | 1.00   |        |        |       |      |      |      |      |      |             |             |      |      |      |      |      |      |      |      |      |      |      |      |      |      |      |      |      |      |      |
| Hv3Hr1g087100 | 0.63 | 0.62        | 0.63        | 0.80   | 1.00   |        |       |      |      |      |      |      |             |             |      |      |      |      |      |      |      |      |      |      |      |      |      |      |      |      |      |      |      |
| Hv4Hr1g012200 | 0.58 | 0.54        | 0.76        | 0.64   | 0.69   | 1.00   |       |      |      |      |      |      |             |             |      |      |      |      |      |      |      |      |      |      |      |      |      |      |      |      |      |      |      |
| Hv7Hr1g024610 | 0.63 | 0.62        | 0.63        | 0.80   | 1.00   | 0.69   | 1.00  |      |      |      |      |      |             |             |      |      |      |      |      |      |      |      |      |      |      |      |      |      |      |      |      |      |      |
| Pt010g179700  | 0.63 | 0.61        | 0.67        | 0.78   | 0.82   | 0.69   | 0.82  | 1.00 |      |      |      |      |             |             |      |      |      |      |      |      |      |      |      |      |      |      |      |      |      |      |      |      |      |
| Pt008g077700  | 0.64 | 0.63        | 0.67        | 0.80   | 0.83   | 0.70   | 0.83  | 0.91 | 1.00 |      |      |      |             |             |      |      |      |      |      |      |      |      |      |      |      |      |      |      |      |      |      |      |      |
| Ga18g298900   | 0.55 | 0.54        | 0.56        | 0.64   | 0.62   | 0.61   | 0.62  | 0.71 | 0.69 | 1.00 |      |      |             |             |      |      |      |      |      |      |      |      |      |      |      |      |      |      |      |      |      |      |      |
| Ga18g299000   | 0.55 | 0.54        | 0.61        | 0.67   | 0.70   | 0.63   | 0.70  | 0.72 | 0.73 | 0.76 | 1.00 |      |             |             |      |      |      |      |      |      |      |      |      |      |      |      |      |      |      |      |      |      |      |
| Ga16g151000   | 0.63 | 0.61        | 0.61        | 0.75   | 0.77   | 0.64   | 0.77  | 0.82 | 0.83 | 0.67 | 0.67 | 1.00 |             |             |      |      |      |      |      |      |      |      |      |      |      |      |      |      |      |      |      |      |      |
| Ga16g044200   | 0.56 | 0.58        | 0.63        | 0.69   | 0.74   | 0.67   | 0.74  | 0.79 | 0.79 | 0.65 | 0.67 | 0.78 | 1.00        |             |      |      |      |      |      |      |      |      |      |      |      |      |      |      |      |      |      |      |      |
| Ga19g108100   | 0.57 | 0.58        | 0.63        | 0.70   | 0.74   | 0.67   | 0.74  | 0.78 | 0.80 | 0.65 | 0.67 | 0.78 | 0.99        | 1.00        |      |      |      |      |      |      |      |      |      |      |      |      |      |      |      |      |      |      |      |
| Ga16g150700   | 0.64 | 0.61        | 0.60        | 0.74   | 0.78   | 0.65   | 0.78  | 0.82 | 0.83 | 0.67 | 0.67 | 0.96 | 0.78        | 0.77        | 1.00 |      |      |      |      |      |      |      |      |      |      |      |      |      |      |      |      |      |      |
| Ga16g044100   | 0.61 | 0.61        | 0.56        | 0.66   | 0.67   | 0.61   | 0.67  | 0.72 | 0.70 | 0.66 | 0.61 | 0.68 | 0.62        | 0.62        | 0.69 | 1.00 |      |      |      |      |      |      |      |      |      |      |      |      |      |      |      |      |      |
| Ga19g108200   | 0.59 | 0.58        | 0.56        | 0.65   | 0.65   | 0.62   | 0.65  | 0.70 | 0.69 | 0.64 | 0.61 | 0.67 | 0.61        | 0.61        | 0.68 | 0.96 | 1.00 |      |      |      |      |      |      |      |      |      |      |      |      |      |      |      |      |
| Ga08g363100   | 0.57 | 0.55        | 0.59        | 0.64   | 0.64   | 0.59   | 0.64  | 0.70 | 0.72 | 0.68 | 0.67 | 0.70 | 0.65        | 0.65        | 0.69 | 0.61 | 0.57 | 1.00 |      |      |      |      |      |      |      |      |      |      |      |      |      |      |      |
| Os04g0488400  | 0.53 | 0.55        | 0.89        | 0.62   | 0.67   | 0.80   | 0.67  | 0.70 | 0.70 | 0.60 | 0.64 | 0.66 | 0.68        | 0.68        | 0.65 | 0.60 | 0.60 | 0.62 | 1.00 |      |      |      |      |      |      |      |      |      |      |      |      |      |      |
| Os05g0518000  | 0.72 | 0.57        | 0.53        | 0.62   | 0.63   | 0.56   | 0.63  | 0.64 | 0.66 | 0.53 | 0.53 | 0.61 | 0.57        | 0.57        | 0.62 | 0.61 | 0.58 | 0.57 | 0.53 | 1.00 |      |      |      |      |      |      |      |      |      |      |      |      |      |
| Os06g0157500  | 0.61 | 0.60        | 0.60        | 0.75   | 0.86   | 0.62   | 0.86  | 0.77 | 0.75 | 0.60 | 0.66 | 0.72 | 0.69        | 0.69        | 0.72 | 0.65 | 0.64 | 0.61 | 0.61 | 0.59 | 1.00 |      |      |      |      |      |      |      |      |      |      |      |      |
| Os06g0552900  | 0.61 | 0.87        | 0.54        | 0.62   | 0.62   | 0.57   | 0.62  | 0.62 | 0.64 | 0.56 | 0.55 | 0.62 | 0.59        | 0.59        | 0.62 | 0.61 | 0.58 | 0.56 | 0.56 | 0.57 | 0.61 | 1.00 |      |      |      |      |      |      |      |      |      |      |      |
| Os11g0293800  | 0.57 | 0.56        | 0.79        | 0.69   | 0.72   | 0.87   | 0.72  | 0.75 | 0.75 | 0.65 | 0.67 | 0.69 | 0.73        | 0.73        | 0.68 | 0.61 | 0.61 | 0.65 | 0.82 | 0.57 | 0.67 | 0.58 | 1.00 |      |      |      |      |      |      |      |      |      |      |
| Os12g0232300  | 0.54 | 0.53        | 0.68        | 0.64   | 0.62   | 0.72   | 0.62  | 0.65 | 0.67 | 0.53 | 0.57 | 0.62 | 0.62        | 0.62        | 0.62 | 0.57 | 0.58 | 0.56 | 0.72 | 0.53 | 0.58 | 0.54 | 0.74 | 1.00 |      |      |      |      |      |      |      |      |      |
| Os06g0157700  | 0.61 | 0.62        | 0.64        | 0.80   | 0.91   | 0.66   | 0.91  | 0.81 | 0.82 | 0.63 | 0.69 | 0.77 | 0.74        | 0.73        | 0.78 | 0.66 | 0.65 | 0.64 | 0.67 | 0.62 | 0.86 | 0.63 | 0.72 | 0.63 | 1.00 |      |      |      |      |      |      |      |      |
| AtFT          | 0.58 | 0.62        | 0.65        | 0.71   | 0.72   | 0.68   | 0.72  | 0.79 | 0.79 | 0.62 | 0.63 | 0.73 | 0.74        | 0.74        | 0.73 | 0.66 | 0.66 | 0.64 | 0.70 | 0.59 | 0.69 | 0.64 | 0.71 | 0.64 | 0.73 | 1.00 |      |      |      |      |      |      |      |
| Mt6g033040    | 0.60 | 0.61        | 0.61        | 0.70   | 0.73   | 0.65   | 0.73  | 0.80 | 0.79 | 0.67 | 0.69 | 0.86 | 0.78        | 0.77        | 0.86 | 0.70 | 0.68 | 0.67 | 0.65 | 0.61 | 0.71 | 0.61 | 0.69 | 0.62 | 0.74 | 0.71 | 1.00 |      |      |      |      |      |      |
| MtFTc         | 0.54 | 0.54        | 0.54        | 0.61   | 0.62   | 0.59   | 0.62  | 0.68 | 0.67 | 0.59 | 0.57 | 0.64 | 0.60        | 0.60        | 0.66 | 0.76 | 0.76 | 0.57 | 0.57 | 0.56 | 0.64 | 0.55 | 0.57 | 0.51 | 0.61 | 0.61 | 0.61 | 0.64 | 1.00 |      |      |      |      |
| MtFTb2        | 0.60 | 0.54        | 0.59        | 0.68   | 0.69   | 0.64   | 0.69  | 0.74 | 0.74 | 0.70 | 0.70 | 0.69 | 0.72        | 0.71        | 0.70 | 0.65 | 0.63 | 0.74 | 0.62 | 0.57 | 0.65 | 0.54 | 0.68 | 0.59 | 0.69 | 0.65 | 0.71 | 0.60 | 1.00 |      |      |      |      |
| MtFTb1        | 0.61 | 0.55        | 0.60        | 0.68   | 0.69   | 0.66   | 0.69  | 0.75 | 0.74 | 0.69 | 0.70 | 0.70 | 0.71        | 0.70        | 0.70 | 0.67 | 0.65 | 0.72 | 0.64 | 0.59 | 0.68 | 0.57 | 0.69 | 0.60 | 0.69 | 0.69 | 0.72 | 0.63 | 0.92 | 1.00 |      |      |      |
| MtFTa2        | 0.57 | 0.55        | 0.61        | 0.67   | 0.70   | 0.62   | 0.70  | 0.70 | 0.74 | 0.56 | 0.59 | 0.70 | 0.77        | 0.77        | 0.70 | 0.60 | 0.57 | 0.59 | 0.64 | 0.59 | 0.64 | 0.54 | 0.65 | 0.59 | 0.69 | 0.67 | 0.65 | 0.55 | 0.65 | 0.65 | 1.00 |      |      |
| MtFTa1        | 0.57 | 0.54        | 0.63        | 0.70   | 0.73   | 0.65   | 0.73  | 0.77 | 0.77 | 0.59 | 0.63 | 0.75 | 0.83        | 0.83        | 0.75 | 0.61 | 0.59 | 0.65 | 0.67 | 0.57 | 0.69 | 0.57 | 0.69 | 0.61 | 0.72 | 0.73 | 0.73 | 0.60 | 0.69 | 0.72 | 0.77 | 1.00 |      |
| MtFTa         | 0.57 | <u>0.54</u> | <u>0.64</u> | 0.70   | 0.72   | 0.66   | 0.72  | 0.76 | 0.76 | 0.60 | 0.64 | 0.74 | <u>0.84</u> | <u>0.84</u> | 0.74 | 0.61 | 0.59 | 0.65 | 0.67 | 0.57 | 0.68 | 0.56 | 0.70 | 0.60 | 0.73 | 0.72 | 0.74 | 0.59 | 0.70 | 0.72 | 0.77 | 0.99 | 1.00 |

Homology matrix of FT-like proteins in the indicated species. Note: the bottom row listed the sequence homology of MsFTa with 32 FTs from the indicated plant species. The identity with MtFTs was shaded, and the identity of Mt6g033040 with its paralogs was boxed. The lowest and highest identities with FTs from non-medicago species were underlined.

**Table S2.** Primers used in this study.

| Name              | Sequence                                              | Note                                                                                                                                                           |
|-------------------|-------------------------------------------------------|----------------------------------------------------------------------------------------------------------------------------------------------------------------|
| 5'-RACE           | 5'-ATCGTTTCCACCAACACTCACTCTGGG-3'                     |                                                                                                                                                                |
| 3'-RACE           | 5'-ATGGCTGGTAGCAGTAGGAATCCACTGG-3'                    |                                                                                                                                                                |
| degenerate primer | 5'-ATG(A/C/G)TGGTAG(T/C)AG(T/A)(A/C)(G/C)AA(T/C)CC-3' |                                                                                                                                                                |
| degenerate primer | 5'- T(C/T)ATCTAAA(C/G)(C/G)T(T/C)CTCCNCCAGA-3'        |                                                                                                                                                                |
| pBI-MsFTa -f      | 15'- <u>CCCGGG</u> ATGGCTGGTAGCAGTAGGAATCCA-3'        | Construction of a 35S:: <i>MsFTa</i> ORF binary vector using XbaI-BamHI for <i>Arabidopsis</i> transformation; also used in verification of transgenic plants. |
| pBI-MsFTa -r      | 25'- <u>TCTAGATT</u> ATCTAAAGGTTCTTCC-3'              |                                                                                                                                                                |
| FT-GF             | 35'- <u>CTCGAGAT</u> GGCTGGTAGCAGTAGGAATCCAC-3'       | Sub-cloning of <i>MsFTa</i> into a GFP fusion binary vector for transient expression                                                                           |
| FT-GR             | 45'- <u>ACTAGTTCT</u> AAAGGTTCTTCCGCCAGAGCCAC-3'      |                                                                                                                                                                |
| MsFTa - 1         | 5'-TGTATCACCATGAGTCAAGACATTG-3'                       | <i>MsFTa</i> -specific primers for RT-PCR                                                                                                                      |
| MsFTa -2          | 5'-CAATGTCTTGACTCATGGTGATACA-3'                       |                                                                                                                                                                |
| MsFTa1G-f         | 5' -ATGGCTGGTAGCAGTAGGAATCCACT-3'                     | Amplification of genomic sequence of MsFTa                                                                                                                     |
| MsFTa1G-r         | 5' -TTATCTAAAGGTTCTTCCCTCCAGAGCCACTC-3'               |                                                                                                                                                                |
| MsActin-1         | 5'-CAAAAGATGGCAGATGCTGAGGAT-3'                        | RT-PCR of <i>Actin</i> from alfalfa                                                                                                                            |

|                |                                   |                                                                                                                               |
|----------------|-----------------------------------|-------------------------------------------------------------------------------------------------------------------------------|
| MsActin-2      | 5'-CATGACACCAGTATGACGAGGTCG-3'    | Verification of transgenic Arabidopsis using genomic DNA<br><br>RT-PCR of <i>Actin2</i> ( <i>At3g18780</i> ) from Arabidopsis |
| 35S promoter-f | 5'- CACTATCCTTCGCAAGACCC-3'       |                                                                                                                               |
| MsFT-3r        | 5'-TCTAAAGGTTCTCCGCCAGAGCC-3'     |                                                                                                                               |
| Actin-1        | 5' -GAAGTCTTGTTCCAGCCCTCGTTTG -3' |                                                                                                                               |
| Actin-2        | 5' -GAACCACCGATCCAGACACTGTACT-3'  |                                                                                                                               |

Underlined sequences are recognition sites for <sup>1</sup>XbaI, <sup>2</sup>Sma I, <sup>3</sup>Xho I and <sup>4</sup>Spe I, respectively.

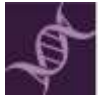

```
TAAATTCAAGCAGAAAGATTGGTACGCAACAGGAAAGGAATATTTATCCATGACCTCTATCTTTCTTCT
ATAAATACCTCTAGCAATTGGTGGTTACCCCTAAGACAAAATTTGTGTATAAAAGTGTGAGAAGCTGAGAAC
CACATATGGCTGGTAGCAGTAGGAATCCACTGGCTGTAGGGCGTGAATAGGGGATGTGATAGACTCCT
M A G S S R N P L A V G R V I G D V I D S
TTGAAAGTTCCATTCTCTCCGAGTGACCTATGGTAATAAAGATGTGAATAATGGTTGTGAGCTCAAAC
F E S S I P L R V T Y G N K D V N N G C E L K
CTTCTCAAATTTGGCAATCAACCCAGAGTGAGTGTGGTGGAAACGATCTCAGAAACCTCTACACCCTAG
P S Q I G N Q P R V S V G G N D L R N L Y T L
TTATGGTGGATCCTGATTCACCTAGCCCAAGTAACCCCACTTTTAAGGAGTACCTCCACTGGTTGGTGA
V M V D P D S P S P S N P T F K E Y L H W L V
CTGATATCCAGGAACCACTGAAGTCACTTTTCGGTAATGAGGTTGTAAATTATGAAAGGCCACGACCCA
T D I P G T T E V T F G N E V V N Y E R P R P
CTTCGGGGATCCATCGTTTCGTGTTTGTCCATTTTCATCAACAATGTAGACAAAGGGTTTATGCTCCAG
T S G I H R F V F V L F H Q Q C R Q R V Y A P
GATGGCGACAAAATTTCAACACAAGAGAATTTGCTGAACTCTACAATCTTGATCACCTGTTGCTGCTG
G W R Q N F N T R E F A E L Y N L G S P V A A
TCTTCTCAATTGTCAAAGGGAGAGTGGCTCTGGCGGAAGAACCTTTAGATAATTATTATATTAACAT
V F F N C Q R E S G S G G R T F R *
ATTAATTAATAAAGTGAAGCTTAGGGCTGGTTTGGTATCACAATGTATCACCATGAGTCAAGAC
ATTGTAATATCAAACATATGCGTAGTTAAGTTAGTTAGTAATTAATAACTGCAACACCCAAATAAAAGT
TAATTATATTTACATATACACATTATACACTCACACACGCCAAATTAATACACAATTGTAAGTAGCA
AATACTAAGTATAGATATGTGTGTCGTTTTATGTTTGTGTATGTATAATGTATCGTATATTATCATCAA
TCAATAAAGAGCTTCCCACTGCCATTGATATATGTCAGAAAAAAAAAAAAAAAAAAAAAAAAAAAAA
```

**Figure S1.** The full-length cDNA sequence of *MsFTa* and its encoding protein. The full-length cDNA of *MsFTa* (GenBank: JF681135) with an open reading frame of 531-bp encoding 176 amino acid residues.

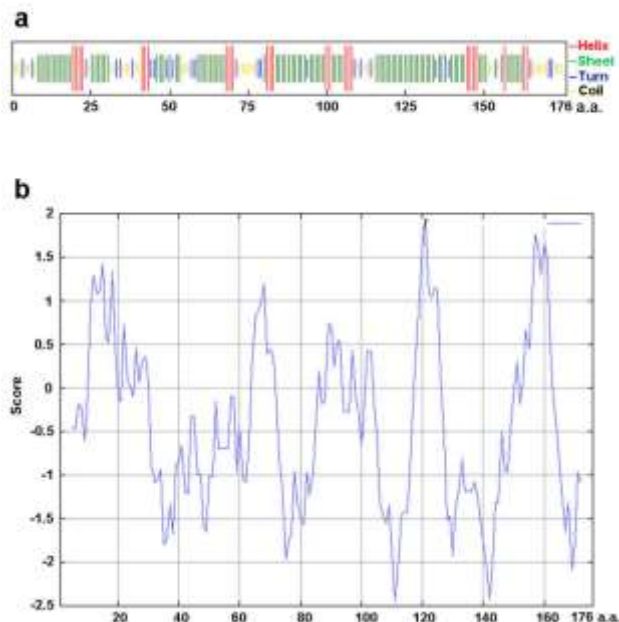

**Figure S2.** Feature prediction of the deduced *MsFTa* protein. (a). Prediction of the secondary structure of *MsFTa* using LYON-GERLAND PBIL online software. The color lines denote the secondary structures: helix (red), sheet (green), turn (blue) and coil (yellow). (b). Hydrophobicity prediction of

MsFTa using ScanProsite online software. Negative values indicate polar amino acids, while positive values for nonpolar amino acids. ScanProsite analysis indicates that MsFTa is a hydrophilic protein.

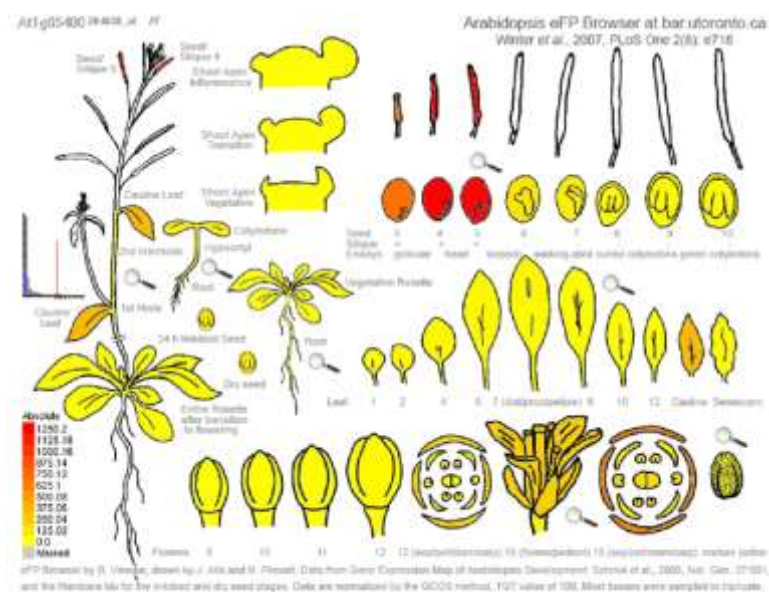

**Figure S3.** eFP Browser of *AtFT* (*At1g65480*) expression profile during Arabidopsis development.

© 2019 by the authors. Licensee MDPI, Basel, Switzerland. This article is an open access article distributed under

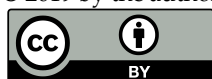

the terms and conditions of the Creative Commons Attribution (CC BY) license (<http://creativecommons.org/licenses/by/4.0/>).
